# Supplementary material for: 3-D flower-like NiCo alloy nano/microstructures grown by a surfactant-assisted solvothermal process
Source: Royal Society of Chemistry journal article supplement (doi:10.1039/c0ce00468e), 2010-11-05
Supplement: c0ce00468e.pdf [file c0ce00468e.pdf]

## Electronic Supplementary Information

### 3-D Flower-like NiCo Alloy Nano / Microstructures Grown by a Surfactant-assisted Solvothermal Process

*Xian-Wen Wei\**, *Xian-Min Zhou*, *Kong-Lin Wu*, and *Yang Chen*

College of Chemistry and Materials Science, Key Laboratory of Functional Molecular

Solids, The Ministry of Education, Anhui Laboratory of Molecule-based Materials,

Anhui Normal University, Wuhu, 241000, P. R. China.

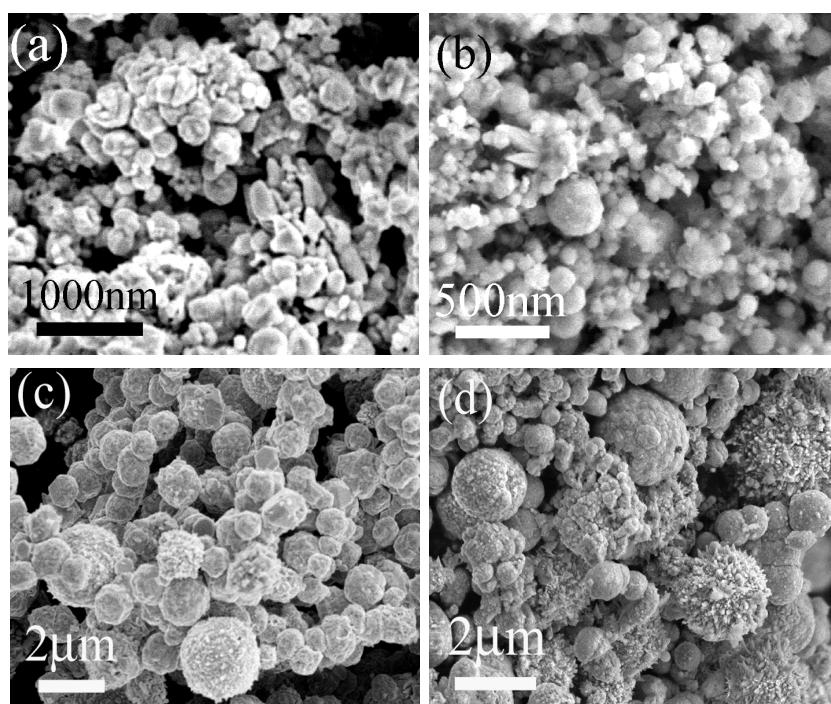

**Figure S1.** SEM images of the NiCo alloy obtained at different surfactants and solvents with other parameters constant: (a) no surfactant, (b) SDS. (c) H<sub>2</sub>O and (d) EG, respectively.

**Table S1.** The initial NiCo composition, the final composition and the morphology obtained for the Ni<sub>x</sub>Co<sub>1-x</sub> alloys synthesized by a specified ratio of Ni<sup>2+</sup> and Co<sup>2+</sup> salts (total 0.2 mol/L) in ethanol at 120 °C for 10 h with other parameters constant.

| Initial Ni <sub>x</sub> Co <sub>1-x</sub> | Final composition                 | Morphology                                                                           |
|-------------------------------------------|-----------------------------------|--------------------------------------------------------------------------------------|
| Ni <sub>100</sub>                         | Ni <sub>100</sub>                 | Aggregated nanoparticles (Figure 4a)                                                 |
| Ni <sub>80</sub> Co <sub>20</sub>         | Ni <sub>76</sub> Co <sub>24</sub> | Mixture of nano- to micro-spheres with rough surface (Figure 4b)                     |
| Ni <sub>60</sub> Co <sub>40</sub>         | Ni <sub>59</sub> Co <sub>41</sub> | Submicrospheres with pleat surface (Figure 4c)                                       |
| Ni <sub>50</sub> Co <sub>50</sub>         | Ni <sub>48</sub> Co <sub>52</sub> | Flower-like submicrospheres with hierarchical structures on their surface (Figure 2) |
| Ni <sub>40</sub> Co <sub>60</sub>         | Ni <sub>39</sub> Co <sub>61</sub> | Mixture of dendrites and flower-like spheres (Figure 4d)                             |
| Ni <sub>20</sub> Co <sub>80</sub>         | Ni <sub>15</sub> Co <sub>85</sub> | Dendrites (Figure 4e)                                                                |
| Co <sub>100</sub>                         | Co <sub>100</sub>                 | Dendrites (Figure 4f)                                                                |

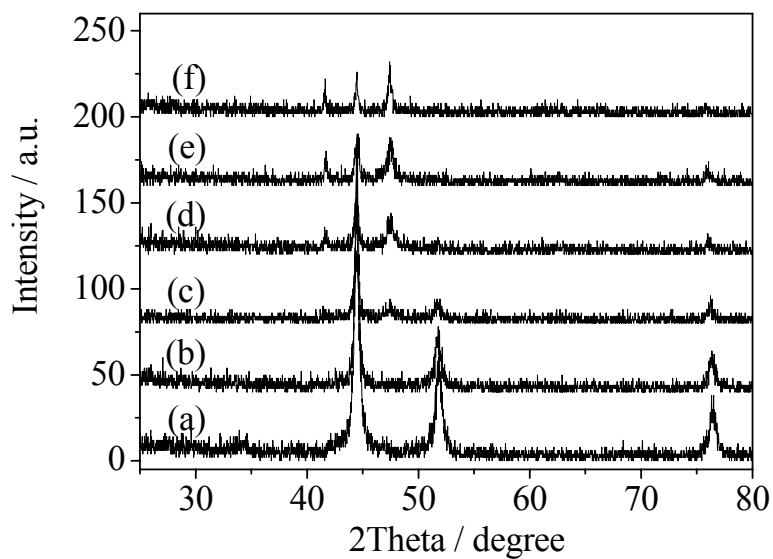

**Figure S2.** XRD patterns of different compositions of NiCo alloys: a) Ni<sub>100</sub>, b) Ni<sub>76</sub>Co<sub>24</sub>, c) Ni<sub>59</sub>Co<sub>41</sub>, d) Ni<sub>39</sub>Co<sub>61</sub>, e) Ni<sub>15</sub>Co<sub>85</sub>, and f) Co<sub>100</sub>.

**Table S2.** Magnetic Data of Obtained NiCo Alloy Samples.

| Samples  | NiCo final composition            | Ms (emu/g) | Mr (emu/g) | Mr/Ms | Hc (Oe) |
|----------|-----------------------------------|------------|------------|-------|---------|
| Sample 1 | Ni <sub>48</sub> Co <sub>52</sub> | 111.33     | 5.643      | 0.044 | 84.27   |
| Sample 2 | Ni <sub>47</sub> Co <sub>53</sub> | 103.58     | 4.593      | 0.051 | 52.71   |
